# Supplementary material for: A novel approach of binary doping sulfur and nitrogen into graphene layers for enhancing electrochemical performances of supercapacitors
Source: Royal Society of Chemistry journal article supplement (doi:10.1039/c6ta08482f), 2016-01-01
Supplement: c6ta08482f1.pdf [file c6ta08482f1.pdf]

## Electronic supplementary information

### A novel approach of binary doping sulfur and nitrogen into graphene layers for enhancing electrochemical performances in supercapacitors

Xuesha Zhang <sup>a</sup>, Pengtao Yan <sup>a</sup>, Ruijun Zhang <sup>a,\*</sup>, Kang Liu <sup>a</sup>, Yanyan Liu <sup>a</sup>, Ting Liu <sup>a</sup>, and Xiaoyu Wang<sup>a, b</sup>

<sup>a</sup> State Key Laboratory of Metastable Materials Science and Technology,

Yanshan University, Qinhuangdao 066004, China

<sup>b</sup> North China University of science and technology, Tangshan 063009,

China

\*Corresponding author. Tel: +86 335 8387598.

E-mail address: zhangrj@ysu.edu.cn (R. Zhang)

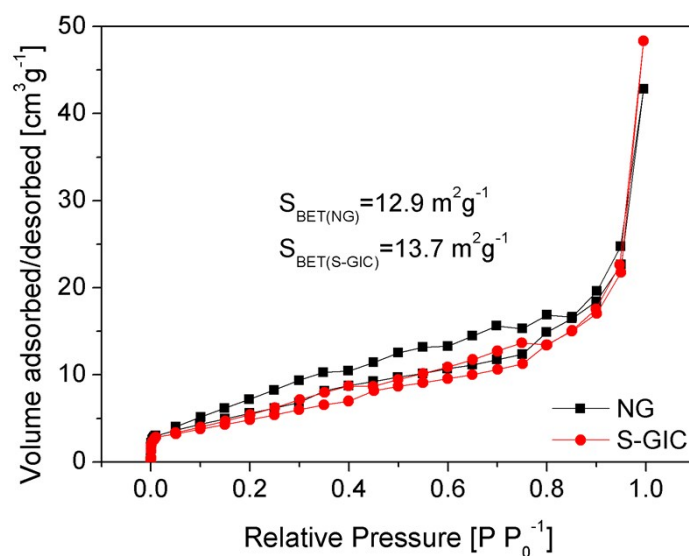

Figure S1 N<sub>2</sub> sorption isotherms of NG and S-GIC

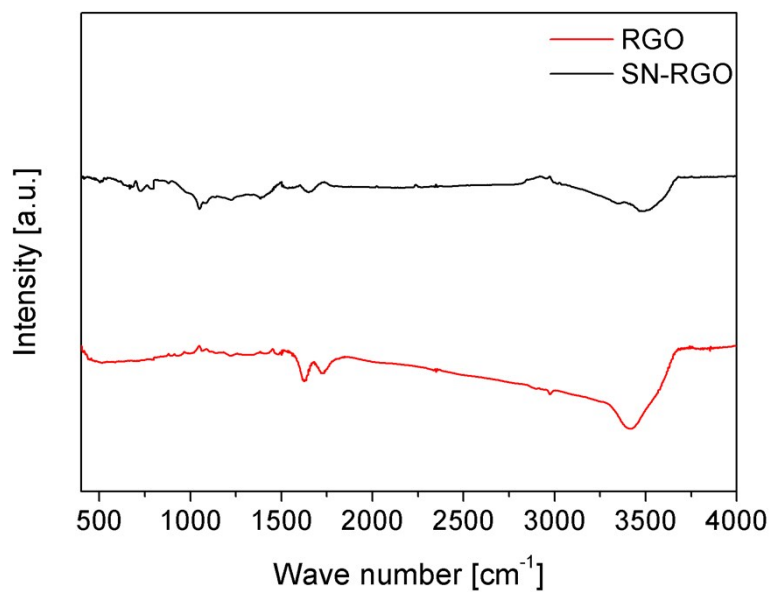

**Figure S2** FTIR spectra of RGO and SN-RGO

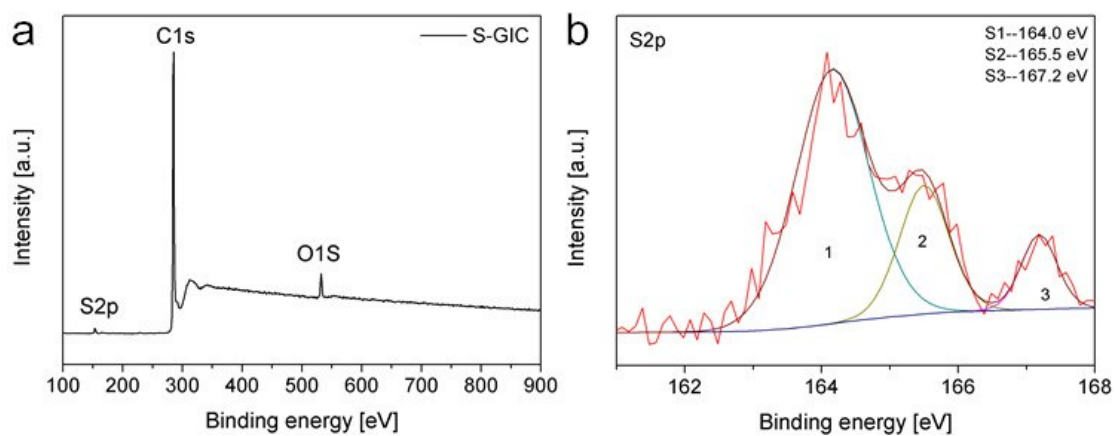

**Figure S3** (a) XPS survey spectrum and (b) high resolution spectrum of S2p of S-GIC

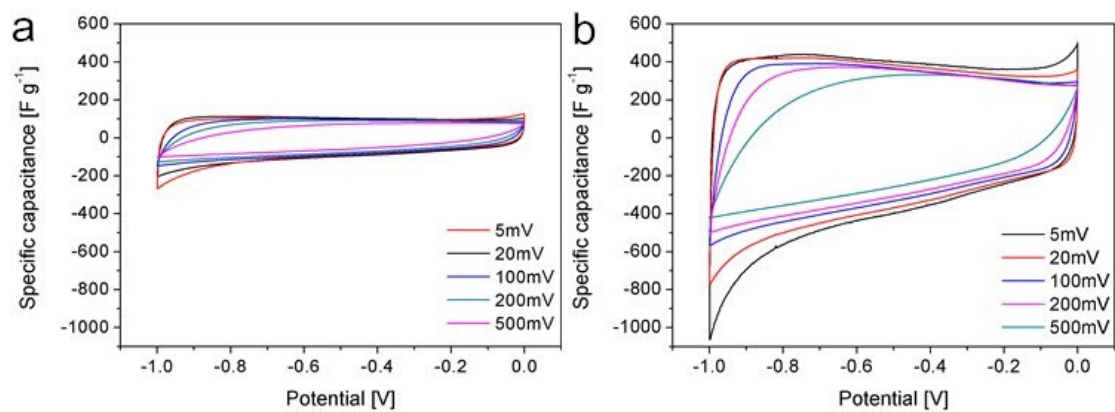

**Figure S4** CV curves of (a) RGO and (b) SN-RGO at different scan rates ranging from 5 to 500  $\text{mV s}^{-1}$

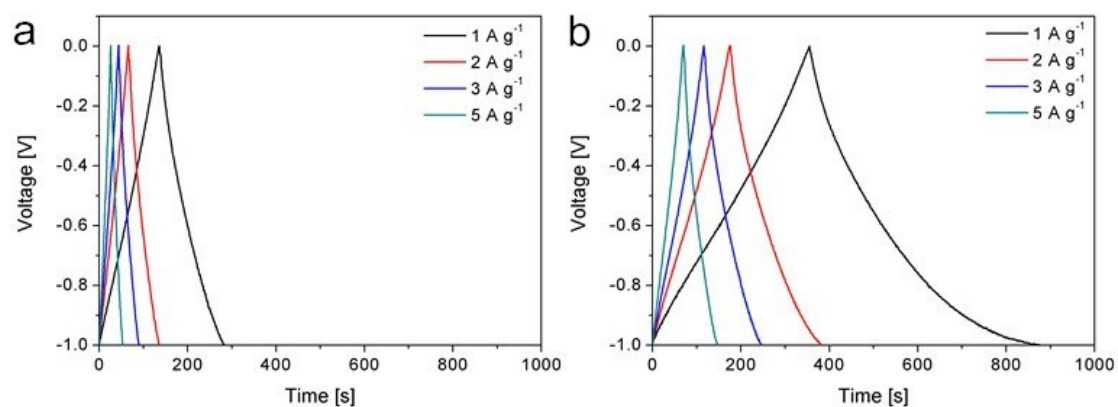

**Figure S5** Galvanostatic charge/discharge curves of (a) RGO and (b) SN-RGO at various current densities
